# Supplementary material for: Neuroglobin: A New Possible Marker of Estrogen-Responsive Breast Cancer
Source: MDPI journal article supplement (doi:10.3390/cells10081986), 2021-08-05
Supplement: s1 [file s1]

## Supplementary Material

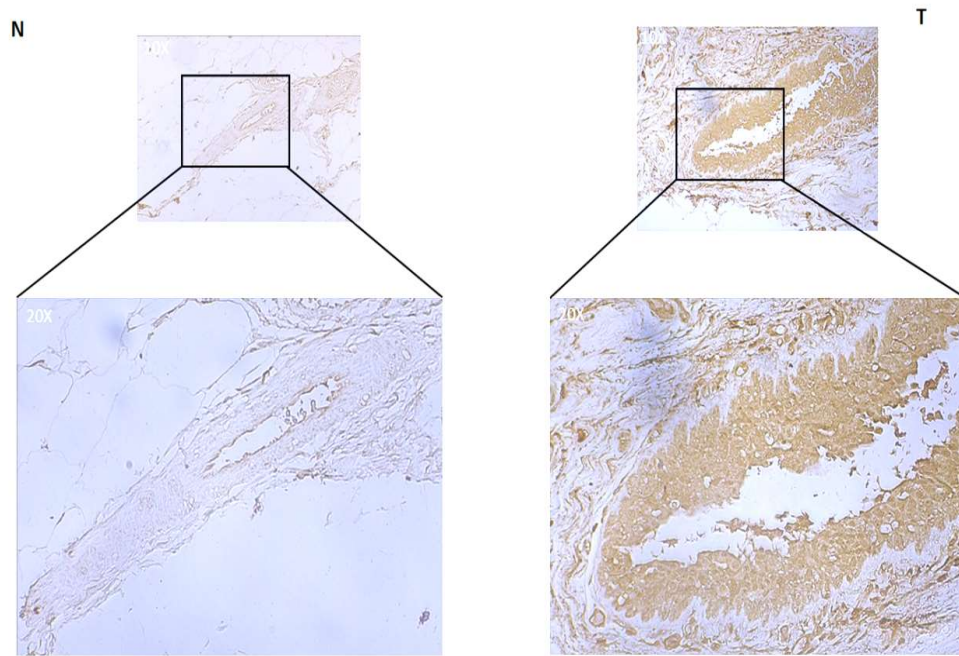

**Figure S1.** Representative immunohistochemical staining of NGB in 1 out of 10 breast G2 grade post-menopausal specimens of breast cancer (T) and normal counterpart (N) obtained by using a polyclonal anti-NGB antibody ( FL-151, Santa Cruz). The black square refers to the below reported optical magnification.
